# Supplementary material for: The interplay of the Notch signaling in hepatic stellate cells and macrophages determines the fate of liver fibrogenesis
Source: PubMed Central journal article supplement (PMC4677309; doi:10.1038/srep18272), 2015-12-14
Supplement: srep18272-s1.pdf [file srep18272-s1.pdf]

**The interplay of the Notch signaling in hepatic stellate cells and macrophages determines the fate of liver fibrogenesis**

Ruchi Bansal<sup>1\*</sup>; Joop van Baarlen<sup>2</sup>; Gert Storm<sup>1,3</sup>; Jai Prakash<sup>1</sup>

**Supplementary Table 1: Antibodies used for the immunohistochemistry**

| <b>Primary Antibody</b>                             | <b>Source</b>     | <b>Dilution</b> |
|-----------------------------------------------------|-------------------|-----------------|
| Polyclonal rabbit $\alpha$ -SMA                     | Abcam             | 1:100           |
| Polyclonal goat anti-collagen I                     | Southern Biotech  | 1:100           |
| Polyclonal goat anti-desmin                         | Santa Cruz        | 1:100           |
| Polyclonal rat anti-F4/80 (MCA497)                  | AbD Serotec       | 1:100           |
| Polyclonal goat anti-vimentin (sc-7557)             | Santa Cruz        | 1:100           |
| Polyclonal rabbit anti-Notch1 (NBP1-78292)          | Novus Biologicals | 1:100           |
| Polyclonal rabbit anti-Notch3 (M134, sc-5593)       | Santa Cruz        | 1:100           |
| Monoclonal rat MHC-II (ER-TR3, sc-59318)            | Santa Cruz        | 1:100           |
| Polyclonal goat anti-chitinase 3-like 3/ECF-L (YM1) | R & D systems     | 1:100           |
| <b>Secondary Antibody</b>                           | <b>Source</b>     | <b>Dilution</b> |
| Polyclonal Goat anti-rabbit IgG                     | DAKO              | 1:100           |
| Polyclonal Rabbit anti-rat IgG                      | DAKO              | 1:100           |
| Polyclonal Rabbit anti-Goat IgG                     | DAKO              | 1:100           |

**Supplementary Table 2: Sequence of the mouse primers used for quantitative real-time PCR**

| Gene          | Forward primer sequence (5'-3') | Reverse primer sequence (5'-3') |
|---------------|---------------------------------|---------------------------------|
| Arginase I    | GTGAAGAACCCACGGTCTGT            | CTGGTTGTCAGGGGAGTGTT            |
| Collagen I    | TGACTGGAAGAGCGGAGAGT            | ATCCATCGGTCATGCTCTCT            |
| Desmin        | ATGCAGCCACTCTAGCTCGT            | CTCATACTGAGCCCGGATGT            |
| DII1          | TCTAGAACACTCTGGGAGCGG           | CTATTAGGAAGCGGCGGTCT            |
| DII4          | TATACCTGCACCTGTCTCCA            | TTACAGCTGCCACCATTTCCG           |
| GAPDH         | ACAGTCCATGCCATCACTGC            | GATCCACGACGGACACATTG            |
| Hes1          | GCGGAATCCCCTGTCTACC             | GTCTTAGGGCTACTTAGTGATCG         |
| IL-1 $\beta$  | GCCAAGACAGGTCGCTCAGGG           | CCCCACACGTTGACAGCTAGG           |
| IL-6          | TGATGCTGGTGACAACCACGGC          | TAAGCCTCCGACTTGTGAAGTGTA        |
| NOS2          | GGTGAAGGGACTGAGCTGTT            | GCTACTCCGTGGAGTGAACAA           |
| Jag1          | ACTGGTGTGTAAGGAAGCGG            | CGCACATTGTTGGTGGTGT             |
| MRC1          | GGGACGTTTCGGTGGACTGTGG          | TTGTGGGCTCTGGTGGGCGA            |
| Notch1        | TGTGGCTTCCTTCTACTGCG            | CTTTGCCGTTGACAGGGTTG            |
| Notch2        | AGCTTGGGCAGTTACATCC             | TGGACATGTGCTTCCCTTCC            |
| Notch3        | GACTGCTCACTGAACGTGGA            | CACACCGGCTGTTGTTGAAG            |
| SOX9          | GTGCAAGCTGGCAAAGTTGA            | TGCTCAGTTCACCGATGTCC            |
| Vimentin      | TCCAGAGAGAGGAAGCCGAA            | AAGGTCAAGACGTGCCAGAG            |
| $\alpha$ -SMA | ACTACTGCCGAGCGTGAGAT            | CCAATGAAAGATGGCTGGAA            |

**Supplementary Table 3: Sequence of the human primers used for quantitative real-time PCR**

| Gene          | Forward primer sequence (5'-3') | Reverse primer sequence (5'-3') |
|---------------|---------------------------------|---------------------------------|
| Collagen I    | GTAAGGATTGACCCCAACC             | CGCCATACTCGAACTGGAAT            |
| Desmin        | GCGGGTTTCGGCTCTAAGG             | AGAAACTCCTGGTTCACCGC            |
| DII1          | GAGGCACTGTGACGACAACG            | GCACACTCGCACACATAGCG            |
| DII4          | AAGGCTGCGCTACTTACC              | GTCATTGCGCTTCTGCACA             |
| GAPDH         | TCCAAAATCAAGTGGGGCGA            | TGATGACCCTTTTGCTCCC             |
| Hes1          | CTGAGCACAGACCCAAGTGT            | GAGTGCGCACCTCGGTATTA            |
| Jag1          | TGAGGCCGTTGCTGACTTAG            | TGAGATGCGGCACTCGATTT            |
| Notch1        | GAATGGTCAATGCGAGTGGC            | CCGCAGAGGGTTGTATTGGT            |
| Notch2        | AGAATCAGCCCTGCCAGAAT            | CAATGCCCTGGATGGAAAATGG          |
| Notch3        | CATGGTATCTGCACCAACCT            | TTGATGTCCTGATCGCAGGAAG          |
| Vimentin      | AAATGGCTCGTCACCTTCGT            | CAGCTTCTGTAGGTGGCAA             |
| $\alpha$ -SMA | CCCCATCTATGAGGGCTATG            | CAGTGGCCATCTCATTTTCA            |

**Supplementary Table 4: Antibodies used for western blot analysis**

| <b>Primary Antibody</b>                       | <b>Source</b>     | <b>Dilution</b> |
|-----------------------------------------------|-------------------|-----------------|
| Polyclonal rabbit anti-Notch1 (NBP1-78292)    | Novus Biologicals | 1:250           |
| Polyclonal rabbit anti-Notch3 (M134, sc-5593) | Santa Cruz        | 1:250           |
| Monoclonal mouse $\beta$ -actin antibody      | Sigma Aldrich     | 1:5000          |
| <b>Secondary Antibody</b>                     | <b>Source</b>     | <b>Dilution</b> |
| Polyclonal Goat anti-rabbit IgG               | DAKO              | 1:2000          |
| Polyclonal goat anti-mouse IgG                | DAKO              | 1:1000          |
| Polyclonal Rabbit anti-Goat IgG               | DAKO              | 1:2000          |
